# Supplementary material
Source: Springer Nature journal article supplement (https://www.springermedizin.de/resource/supplementary/12906_2009_244_MOESM1_ESM.pdf/9524352)
Supplement: MOESM1 [file 9524352]

## Context

Reasons for Seeking  
'Treatment'

Expressed Hopes from  
Having the 'Treatment'

Finding Ways to  
Remain Healthy

Openness to Change

Readiness to Change

Previously Experienced  
Treatment Benefits

Treatment Environment

## Mechanism

Nature and Style of  
Treatment Sessions

Relationship Building

Working Together

Experienced Symptom  
Changes / Benefits  
from the 'Treatment'

## Outcome

Reasons for Seeking  
'Treatment'

Critical Health Literacy

Sense of Control
